# Supplementary material
Source: Springer Nature journal article supplement (https://www.springermedizin.de/resource/supplementary/12885_2010_2601_MOESM6_ESM.pdf/9461552)

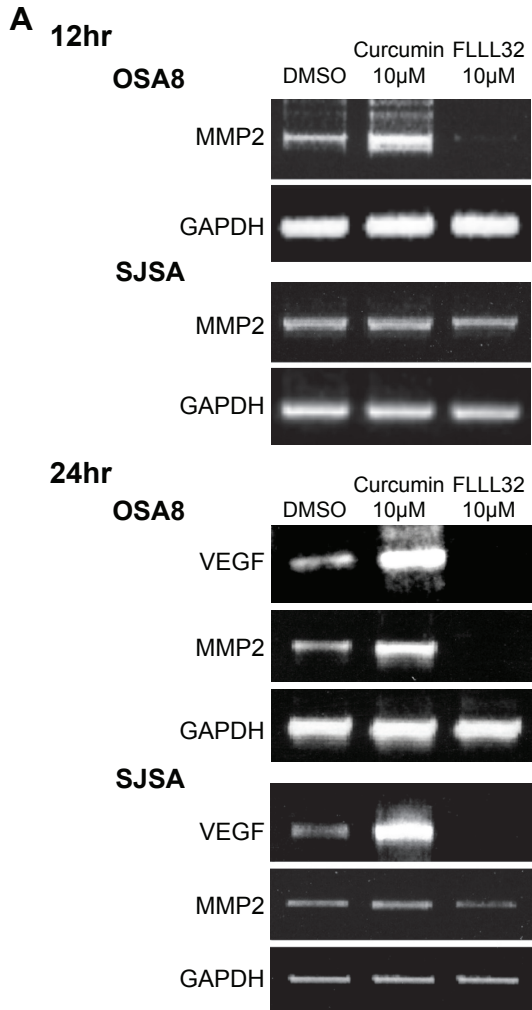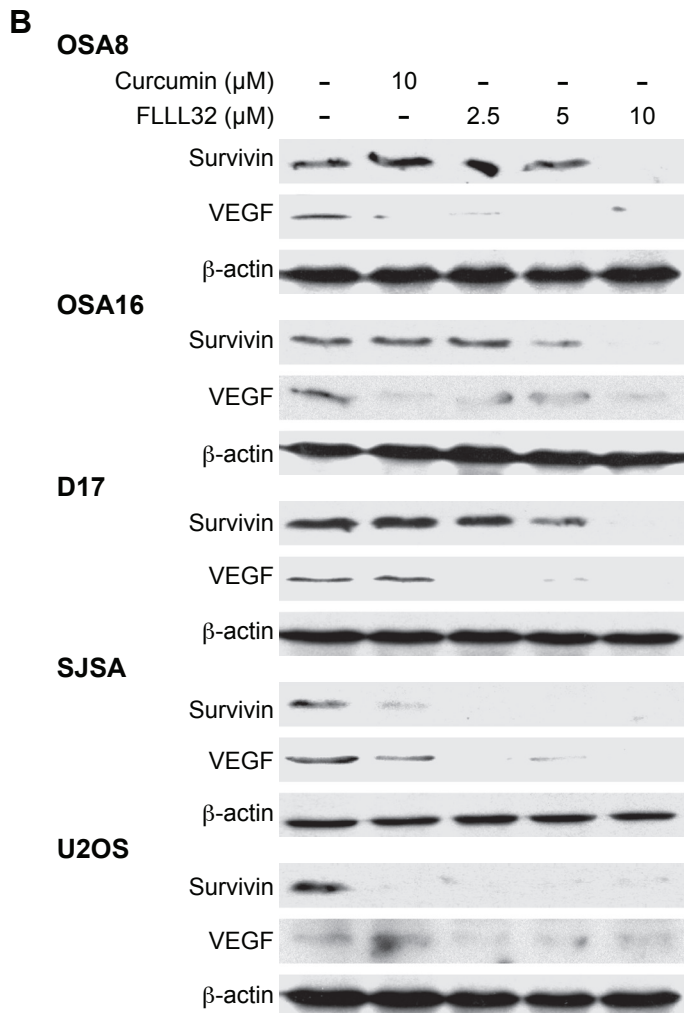

Supplement: MOESM6 [file 9461552]
